# Supplementary material for: FNDC5 overexpression promotes the survival rate of bone marrow mesenchymal stem cells after transplantation in a rat cerebral infarction model
Source: PubMed Central journal article supplement — Ann Transl Med. 2022 Jan;10(2):90. doi: 10.21037/atm-21-6868 (PMC8848396; doi:10.21037/atm-21-6868), 2022-01
Supplement: atm-10-02-90-coif.pdf [file atm-10-02-90-coif.pdf]

## ICMJE DISCLOSURE FORM

Date: Dec. 21 2021

Your Name: Huan Wei

Manuscript Title: FNDC5 overexpression promotes the survival rate of bone marrow mesenchymal stem cells after transplantation in a rat cerebral infarction model

Manuscript number (if known): \_\_\_\_\_

In the interest of transparency, we ask you to disclose all relationships/activities/interests listed below that are related to the content of your manuscript. "Related" means any relation with for-profit or not-for-profit third parties whose interests may be affected by the content of the manuscript. Disclosure represents a commitment to transparency and does not necessarily indicate a bias. If you are in doubt about whether to list a relationship/activity/interest, it is preferable that you do so.

The following questions apply to the author's relationships/activities/interests as they relate to the current manuscript only.

The author's relationships/activities/interests should be defined broadly. For example, if your manuscript pertains to the epidemiology of hypertension, you should declare all relationships with manufacturers of antihypertensive medication, even if that medication is not mentioned in the manuscript.

In item #1 below, report all support for the work reported in this manuscript without time limit. For all other items, the time frame for disclosure is the past 36 months.

|                                                           |                                                                                                                                                                                | Name all entities with whom you have this relationship or indicate none (add rows as needed)                                                                      | Specifications/Comments (e.g., if payments were made to you or to your institution) |
|-----------------------------------------------------------|--------------------------------------------------------------------------------------------------------------------------------------------------------------------------------|-------------------------------------------------------------------------------------------------------------------------------------------------------------------|-------------------------------------------------------------------------------------|
| <b>Time frame: Since the initial planning of the work</b> |                                                                                                                                                                                |                                                                                                                                                                   |                                                                                     |
| 1                                                         | All support for the present manuscript (e.g., funding, provision of study materials, medical writing, article processing charges, etc.)<br><b>No time limit for this item.</b> | the National Natural Science Foundation of China (81671153)                                                                                                       |                                                                                     |
|                                                           |                                                                                                                                                                                | the Guangdong Provincial Key Laboratory of Diagnosis and Treatment of Major Neurological Diseases (2020B1212060017)                                               |                                                                                     |
|                                                           |                                                                                                                                                                                | Guangdong Provincial Clinical Research Center for Neurological Diseases (2020B1111170002)                                                                         |                                                                                     |
|                                                           |                                                                                                                                                                                | the Southern China International Cooperation Base for Early Intervention and Functional Rehabilitation of Neurological Diseases (2015B050501003, 2020A0505020004) |                                                                                     |
|                                                           |                                                                                                                                                                                | the Science and Technology Project of Kunming Medical and Health Commission (Thousand Project) (No. 2019-03-07-002)                                               |                                                                                     |
|                                                           |                                                                                                                                                                                | the Training plan for Medical Reserve Talents of Yunnan Medical and Health Commission (No. H-2019041)                                                             |                                                                                     |
| <b>Time frame: past 36 months</b>                         |                                                                                                                                                                                |                                                                                                                                                                   |                                                                                     |
| 2                                                         | Grants or contracts from any entity (if not indicated in item #1 above).                                                                                                       | None                                                                                                                                                              |                                                                                     |
|                                                           |                                                                                                                                                                                |                                                                                                                                                                   |                                                                                     |
|                                                           |                                                                                                                                                                                |                                                                                                                                                                   |                                                                                     |

|    |                                                                                                              |      |  |
|----|--------------------------------------------------------------------------------------------------------------|------|--|
| 3  | Royalties or licenses                                                                                        | None |  |
| 4  | Consulting fees                                                                                              | None |  |
| 5  | Payment or honoraria for lectures, presentations, speakers bureaus, manuscript writing or educational events | None |  |
| 6  | Payment for expert testimony                                                                                 | None |  |
| 7  | Support for attending meetings and/or travel                                                                 | None |  |
| 8  | Patents planned, issued or pending                                                                           | None |  |
| 9  | Participation on a Data Safety Monitoring Board or Advisory Board                                            | None |  |
| 10 | Leadership or fiduciary role in other board, society, committee or advocacy group, paid or unpaid            | None |  |
| 11 | Stock or stock options                                                                                       | None |  |
| 12 | Receipt of equipment, materials, drugs, medical writing, gifts or other services                             | None |  |
| 13 | Other financial or non-financial interests                                                                   | None |  |

**Please summarize the above conflict of interest in the following box:**

Huan Wei reports support from the National Natural Science Foundation of China (81671153), the Guangdong Provincial Key Laboratory of Diagnosis and Treatment of Major Neurological Diseases (2020B1212060017), Guangdong Provincial Clinical Research Center for Neurological Diseases (2020B1111170002), the Southern China International Cooperation Base for Early Intervention and Functional Rehabilitation of Neurological Diseases (2015B050501003, 2020A0505020004), the Science and Technology Project of Kunming Medical and Health Commission (Thousand Project) (No. 2019-03-07-002), and the Training plan for Medical Reserve Talents of Yunnan Medical and Health Commission (No. H-2019041)

**Please place an “X” next to the following statement to indicate your agreement:**

  X   I certify that I have answered every question and have not altered the wording of any of the questions on this form.

## ICMJE DISCLOSURE FORM

Date: Dec. 21 2021

Your Name: Kangmei Liu

Manuscript Title: FNDC5 overexpression promotes the survival rate of bone marrow mesenchymal stem cells after transplantation in a rat cerebral infarction model

Manuscript number (if known): \_\_\_\_\_

In the interest of transparency, we ask you to disclose all relationships/activities/interests listed below that are related to the content of your manuscript. "Related" means any relation with for-profit or not-for-profit third parties whose interests may be affected by the content of the manuscript. Disclosure represents a commitment to transparency and does not necessarily indicate a bias. If you are in doubt about whether to list a relationship/activity/interest, it is preferable that you do so.

The following questions apply to the author's relationships/activities/interests as they relate to the current manuscript only.

The author's relationships/activities/interests should be defined broadly. For example, if your manuscript pertains to the epidemiology of hypertension, you should declare all relationships with manufacturers of antihypertensive medication, even if that medication is not mentioned in the manuscript.

In item #1 below, report all support for the work reported in this manuscript without time limit. For all other items, the time frame for disclosure is the past 36 months.

|                                                           |                                                                                                                                                                                | Name all entities with whom you have this relationship or indicate none (add rows as needed)                                                                                                                                                                                                                                                                                                                                                                                                                                                                                                                                                                                                                                                                                                                                    | Specifications/Comments (e.g., if payments were made to you or to your institution) |
|-----------------------------------------------------------|--------------------------------------------------------------------------------------------------------------------------------------------------------------------------------|---------------------------------------------------------------------------------------------------------------------------------------------------------------------------------------------------------------------------------------------------------------------------------------------------------------------------------------------------------------------------------------------------------------------------------------------------------------------------------------------------------------------------------------------------------------------------------------------------------------------------------------------------------------------------------------------------------------------------------------------------------------------------------------------------------------------------------|-------------------------------------------------------------------------------------|
| <b>Time frame: Since the initial planning of the work</b> |                                                                                                                                                                                |                                                                                                                                                                                                                                                                                                                                                                                                                                                                                                                                                                                                                                                                                                                                                                                                                                 |                                                                                     |
| 1                                                         | All support for the present manuscript (e.g., funding, provision of study materials, medical writing, article processing charges, etc.)<br><b>No time limit for this item.</b> | the National Natural Science Foundation of China (81671153)<br>the Guangdong Provincial Key Laboratory of Diagnosis and Treatment of Major Neurological Diseases (2020B1212060017)<br>Guangdong Provincial Clinical Research Center for Neurological Diseases (2020B1111170002)<br>the Southern China International Cooperation Base for Early Intervention and Functional Rehabilitation of Neurological Diseases (2015B050501003, 2020A0505020004)<br>the Guangdong Science and Technology Planning Project (2017B01010015)<br>the Natural Science Foundation of Guangdong Province (2016A030313203)<br>the Guangdong Provincial Engineering Center For Major Neurological Disease Treatment<br>the Guangdong Provincial Translational Medicine Innovation Platform for Diagnosis and Treatment of Major Neurological Disease |                                                                                     |
|                                                           |                                                                                                                                                                                |                                                                                                                                                                                                                                                                                                                                                                                                                                                                                                                                                                                                                                                                                                                                                                                                                                 |                                                                                     |

| Time frame: past 36 months |                                                                                                              |      |  |
|----------------------------|--------------------------------------------------------------------------------------------------------------|------|--|
| 2                          | Grants or contracts from any entity (if not indicated in item #1 above).                                     | None |  |
| 3                          | Royalties or licenses                                                                                        | None |  |
| 4                          | Consulting fees                                                                                              | None |  |
| 5                          | Payment or honoraria for lectures, presentations, speakers bureaus, manuscript writing or educational events | None |  |
| 6                          | Payment for expert testimony                                                                                 | None |  |
| 7                          | Support for attending meetings and/or travel                                                                 | None |  |
| 8                          | Patents planned, issued or pending                                                                           | None |  |
| 9                          | Participation on a Data Safety Monitoring Board or Advisory Board                                            | None |  |
| 10                         | Leadership or fiduciary role in other board, society, committee or advocacy group, paid or unpaid            | None |  |
| 11                         | Stock or stock options                                                                                       | None |  |
| 12                         | Receipt of equipment, materials, drugs, medical writing, gifts or other services                             | None |  |
| 13                         | Other financial or non-financial interests                                                                   | None |  |

**Please summarize the above conflict of interest in the following box:**

Kangmei Liu reports support for the present manuscript from the National Natural Science Foundation of China (81671153), the Guangdong Provincial Key Laboratory of Diagnosis and Treatment of Major Neurological Diseases (2020B1212060017), Guangdong Provincial Clinical Research Center for Neurological Diseases (2020B1111170002), the Southern China International Cooperation Base for Early Intervention and Functional Rehabilitation of Neurological Diseases (2015B050501003, 2020A0505020004), the Guangdong Science and Technology Planning Project (2017B01010015), the Natural Science Foundation of Guangdong Province (2016A030313203), the Guangdong Provincial Engineering Center For Major Neurological Disease Treatment, the Guangdong Provincial Translational Medicine Innovation Platform for Diagnosis and Treatment of Major Neurological Disease.

**Please place an "X" next to the following statement to indicate your agreement:**

**X I certify that I have answered every question and have not altered the wording of any of the questions on this Form.**

## ICMJE DISCLOSURE FORM

Date: Dec. 21 2021

Your Name: Tingting Wang

Manuscript Title: FNDC5 overexpression promotes the survival rate of bone marrow mesenchymal stem cells after transplantation in a rat cerebral infarction model

Manuscript number (if known): \_\_\_\_\_

In the interest of transparency, we ask you to disclose all relationships/activities/interests listed below that are related to the content of your manuscript. "Related" means any relation with for-profit or not-for-profit third parties whose interests may be affected by the content of the manuscript. Disclosure represents a commitment to transparency and does not necessarily indicate a bias. If you are in doubt about whether to list a relationship/activity/interest, it is preferable that you do so.

The following questions apply to the author's relationships/activities/interests as they relate to the current manuscript only.

The author's relationships/activities/interests should be defined broadly. For example, if your manuscript pertains to the epidemiology of hypertension, you should declare all relationships with manufacturers of antihypertensive medication, even if that medication is not mentioned in the manuscript.

In item #1 below, report all support for the work reported in this manuscript without time limit. For all other items, the time frame for disclosure is the past 36 months.

|                                                           |                                                                                                                                                                                | Name all entities with whom you have this relationship or indicate none (add rows as needed)                                               | Specifications/Comments (e.g., if payments were made to you or to your institution) |
|-----------------------------------------------------------|--------------------------------------------------------------------------------------------------------------------------------------------------------------------------------|--------------------------------------------------------------------------------------------------------------------------------------------|-------------------------------------------------------------------------------------|
| <b>Time frame: Since the initial planning of the work</b> |                                                                                                                                                                                |                                                                                                                                            |                                                                                     |
| 1                                                         | All support for the present manuscript (e.g., funding, provision of study materials, medical writing, article processing charges, etc.)<br><b>No time limit for this item.</b> | the Science and Technology Project of Kunming Medical and Health Commission (Thousand Project) (No. 2019-03-07-003)                        |                                                                                     |
|                                                           |                                                                                                                                                                                | the Applied Basic Research of Yunnan Science and Technology Department Associated with Kunming Medical University (No. 202001AY070001-260) |                                                                                     |
| <b>Time frame: past 36 months</b>                         |                                                                                                                                                                                |                                                                                                                                            |                                                                                     |
| 2                                                         | Grants or contracts from any entity (if not indicated in item #1 above).                                                                                                       | None                                                                                                                                       |                                                                                     |
|                                                           |                                                                                                                                                                                |                                                                                                                                            |                                                                                     |
| 3                                                         | Royalties or licenses                                                                                                                                                          | None                                                                                                                                       |                                                                                     |
|                                                           |                                                                                                                                                                                |                                                                                                                                            |                                                                                     |
| 4                                                         | Consulting fees                                                                                                                                                                | None                                                                                                                                       |                                                                                     |
|                                                           |                                                                                                                                                                                |                                                                                                                                            |                                                                                     |
| 5                                                         | Payment or honoraria for lectures, presentations, speakers bureaus, manuscript writing or educational events                                                                   | None                                                                                                                                       |                                                                                     |
|                                                           |                                                                                                                                                                                |                                                                                                                                            |                                                                                     |

|    |                                                                                                   |      |  |
|----|---------------------------------------------------------------------------------------------------|------|--|
| 6  | Payment for expert testimony                                                                      | None |  |
|    |                                                                                                   |      |  |
|    |                                                                                                   |      |  |
| 7  | Support for attending meetings and/or travel                                                      | None |  |
|    |                                                                                                   |      |  |
|    |                                                                                                   |      |  |
| 8  | Patents planned, issued or pending                                                                | None |  |
|    |                                                                                                   |      |  |
|    |                                                                                                   |      |  |
| 9  | Participation on a Data Safety Monitoring Board or Advisory Board                                 | None |  |
|    |                                                                                                   |      |  |
|    |                                                                                                   |      |  |
| 10 | Leadership or fiduciary role in other board, society, committee or advocacy group, paid or unpaid | None |  |
|    |                                                                                                   |      |  |
|    |                                                                                                   |      |  |
| 11 | Stock or stock options                                                                            | None |  |
|    |                                                                                                   |      |  |
|    |                                                                                                   |      |  |
| 12 | Receipt of equipment, materials, drugs, medical writing, gifts or other services                  | None |  |
|    |                                                                                                   |      |  |
|    |                                                                                                   |      |  |
| 13 | Other financial or non-financial interests                                                        | None |  |
|    |                                                                                                   |      |  |
|    |                                                                                                   |      |  |

**Please summarize the above conflict of interest in the following box:**

**Tingting Wang reports supports for the** present manuscript from the Science and Technology Project of Kunming Medical and Health Commission (Thousand Project) (No. 2019-03-07-003) and the Applied Basic Research of Yunnan Science and Technology Department Associated with Kunming Medical University (No. 202001AY070001-260)

**Please place an “X” next to the following statement to indicate your agreement:**

**I certify that I have answered every question and have not altered the wording of any of the questions on this form.**

## ICMJE DISCLOSURE FORM

Date: Dec. 21 2021

Your Name: Yanping Li

Manuscript Title: FNDC5 overexpression promotes the survival rate of bone marrow mesenchymal stem cells after transplantation in a rat cerebral infarction model

Manuscript number (if known): \_\_\_\_\_

In the interest of transparency, we ask you to disclose all relationships/activities/interests listed below that are related to the content of your manuscript. "Related" means any relation with for-profit or not-for-profit third parties whose interests may be affected by the content of the manuscript. Disclosure represents a commitment to transparency and does not necessarily indicate a bias. If you are in doubt about whether to list a relationship/activity/interest, it is preferable that you do so.

The following questions apply to the author's relationships/activities/interests as they relate to the current manuscript only.

The author's relationships/activities/interests should be defined broadly. For example, if your manuscript pertains to the epidemiology of hypertension, you should declare all relationships with manufacturers of antihypertensive medication, even if that medication is not mentioned in the manuscript.

In item #1 below, report all support for the work reported in this manuscript without time limit. For all other items, the time frame for disclosure is the past 36 months.

|                                                           |                                                                                                                                                                                | Name all entities with whom you have this relationship or indicate none (add rows as needed)                        | Specifications/Comments (e.g., if payments were made to you or to your institution) |
|-----------------------------------------------------------|--------------------------------------------------------------------------------------------------------------------------------------------------------------------------------|---------------------------------------------------------------------------------------------------------------------|-------------------------------------------------------------------------------------|
| <b>Time frame: Since the initial planning of the work</b> |                                                                                                                                                                                |                                                                                                                     |                                                                                     |
| 1                                                         | All support for the present manuscript (e.g., funding, provision of study materials, medical writing, article processing charges, etc.)<br><b>No time limit for this item.</b> | the Science and Technology Project of Kunming Medical and Health Commission (Thousand Project) (No. 2020-03-07-111) |                                                                                     |
|                                                           |                                                                                                                                                                                |                                                                                                                     |                                                                                     |
|                                                           |                                                                                                                                                                                |                                                                                                                     |                                                                                     |
| <b>Time frame: past 36 months</b>                         |                                                                                                                                                                                |                                                                                                                     |                                                                                     |
| 2                                                         | Grants or contracts from any entity (if not indicated in item #1 above).                                                                                                       | None                                                                                                                |                                                                                     |
|                                                           |                                                                                                                                                                                |                                                                                                                     |                                                                                     |
| 3                                                         | Royalties or licenses                                                                                                                                                          | None                                                                                                                |                                                                                     |
|                                                           |                                                                                                                                                                                |                                                                                                                     |                                                                                     |
| 4                                                         | Consulting fees                                                                                                                                                                | None                                                                                                                |                                                                                     |
|                                                           |                                                                                                                                                                                |                                                                                                                     |                                                                                     |
| 5                                                         | Payment or honoraria for lectures, presentations, speakers bureaus, manuscript writing or educational events                                                                   | None                                                                                                                |                                                                                     |
|                                                           |                                                                                                                                                                                |                                                                                                                     |                                                                                     |
|                                                           |                                                                                                                                                                                |                                                                                                                     |                                                                                     |

|    |                                                                                                   |      |  |
|----|---------------------------------------------------------------------------------------------------|------|--|
| 6  | Payment for expert testimony                                                                      | None |  |
|    |                                                                                                   |      |  |
|    |                                                                                                   |      |  |
| 7  | Support for attending meetings and/or travel                                                      | None |  |
|    |                                                                                                   |      |  |
|    |                                                                                                   |      |  |
| 8  | Patents planned, issued or pending                                                                | None |  |
|    |                                                                                                   |      |  |
|    |                                                                                                   |      |  |
| 9  | Participation on a Data Safety Monitoring Board or Advisory Board                                 | None |  |
|    |                                                                                                   |      |  |
|    |                                                                                                   |      |  |
| 10 | Leadership or fiduciary role in other board, society, committee or advocacy group, paid or unpaid | None |  |
|    |                                                                                                   |      |  |
|    |                                                                                                   |      |  |
| 11 | Stock or stock options                                                                            | None |  |
|    |                                                                                                   |      |  |
|    |                                                                                                   |      |  |
| 12 | Receipt of equipment, materials, drugs, medical writing, gifts or other services                  | None |  |
|    |                                                                                                   |      |  |
|    |                                                                                                   |      |  |
| 13 | Other financial or non-financial interests                                                        | None |  |
|    |                                                                                                   |      |  |
|    |                                                                                                   |      |  |

**Please summarize the above conflict of interest in the following box:**

**Yanping Li** reports support for the present manuscript from the Science and Technology Project of Kunming Medical and Health Commission (Thousand Project) (No. 2020-03-07-111).

**Please place an “X” next to the following statement to indicate your agreement:**

**X** **I certify that I have answered every question and have not altered the wording of any of the questions on this form.**



## ICMJE DISCLOSURE FORM

Date: Dec. 21 2021

Your Name: Shaolei Guo

Manuscript Title: FNDC5 overexpression promotes the survival rate of bone marrow mesenchymal stem cells after transplantation in a rat cerebral infarction model

Manuscript number (if known): \_\_\_\_\_

In the interest of transparency, we ask you to disclose all relationships/activities/interests listed below that are related to the content of your manuscript. "Related" means any relation with for-profit or not-for-profit third parties whose interests may be affected by the content of the manuscript. Disclosure represents a commitment to transparency and does not necessarily indicate a bias. If you are in doubt about whether to list a relationship/activity/interest, it is preferable that you do so.

The following questions apply to the author's relationships/activities/interests as they relate to the current manuscript only.

The author's relationships/activities/interests should be defined broadly. For example, if your manuscript pertains to the epidemiology of hypertension, you should declare all relationships with manufacturers of antihypertensive medication, even if that medication is not mentioned in the manuscript.

In item #1 below, report all support for the work reported in this manuscript without time limit. For all other items, the time frame for disclosure is the past 36 months.

|                                                           |                                                                                                                                                                                | Name all entities with whom you have this relationship or indicate none (add rows as needed)                                                   | Specifications/Comments (e.g., if payments were made to you or to your institution) |
|-----------------------------------------------------------|--------------------------------------------------------------------------------------------------------------------------------------------------------------------------------|------------------------------------------------------------------------------------------------------------------------------------------------|-------------------------------------------------------------------------------------|
| <b>Time frame: Since the initial planning of the work</b> |                                                                                                                                                                                |                                                                                                                                                |                                                                                     |
| 1                                                         | All support for the present manuscript (e.g., funding, provision of study materials, medical writing, article processing charges, etc.)<br><b>No time limit for this item.</b> | the Guangdong Science and Technology Planning Project (2017B01010015)<br>the Natural Science Foundation of Guangdong Province (2016A030313203) |                                                                                     |
| <b>Time frame: past 36 months</b>                         |                                                                                                                                                                                |                                                                                                                                                |                                                                                     |
| 2                                                         | Grants or contracts from any entity (if not indicated in item #1 above).                                                                                                       | None                                                                                                                                           |                                                                                     |
| 3                                                         | Royalties or licenses                                                                                                                                                          | None                                                                                                                                           |                                                                                     |
| 4                                                         | Consulting fees                                                                                                                                                                | None                                                                                                                                           |                                                                                     |
| 5                                                         | Payment or honoraria for lectures, presentations, speakers bureaus, manuscript writing or educational events                                                                   | None                                                                                                                                           |                                                                                     |

|    |                                                                                                   |      |  |
|----|---------------------------------------------------------------------------------------------------|------|--|
| 6  | Payment for expert testimony                                                                      | None |  |
|    |                                                                                                   |      |  |
|    |                                                                                                   |      |  |
| 7  | Support for attending meetings and/or travel                                                      | None |  |
|    |                                                                                                   |      |  |
|    |                                                                                                   |      |  |
| 8  | Patents planned, issued or pending                                                                | None |  |
|    |                                                                                                   |      |  |
|    |                                                                                                   |      |  |
| 9  | Participation on a Data Safety Monitoring Board or Advisory Board                                 | None |  |
|    |                                                                                                   |      |  |
|    |                                                                                                   |      |  |
| 10 | Leadership or fiduciary role in other board, society, committee or advocacy group, paid or unpaid | None |  |
|    |                                                                                                   |      |  |
|    |                                                                                                   |      |  |
| 11 | Stock or stock options                                                                            | None |  |
|    |                                                                                                   |      |  |
|    |                                                                                                   |      |  |
| 12 | Receipt of equipment, materials, drugs, medical writing, gifts or other services                  | None |  |
|    |                                                                                                   |      |  |
|    |                                                                                                   |      |  |
| 13 | Other financial or non-financial interests                                                        | None |  |
|    |                                                                                                   |      |  |
|    |                                                                                                   |      |  |

**Please summarize the above conflict of interest in the following box:**

Shaolei Guo reports supports for the present manuscript from the Guangdong Science and Technology Planning Project (2017B01010015) and the Natural Science Foundation of Guangdong Province (2016A030313203).

**Please place an "X" next to the following statement to indicate your agreement:**

**X** I certify that I have answered every question and have not altered the wording of any of the questions on this form.

## ICMJE DISCLOSURE FORM

Date: Dec. 21 2021

Your Name: Ling Li

Manuscript Title: FNDC5 overexpression promotes the survival rate of bone marrow mesenchymal stem cells after transplantation in a rat cerebral infarction model

Manuscript number (if known): \_\_\_\_\_

In the interest of transparency, we ask you to disclose all relationships/activities/interests listed below that are related to the content of your manuscript. "Related" means any relation with for-profit or not-for-profit third parties whose interests may be affected by the content of the manuscript. Disclosure represents a commitment to transparency and does not necessarily indicate a bias. If you are in doubt about whether to list a relationship/activity/interest, it is preferable that you do so.

The following questions apply to the author's relationships/activities/interests as they relate to the current manuscript only.

The author's relationships/activities/interests should be defined broadly. For example, if your manuscript pertains to the epidemiology of hypertension, you should declare all relationships with manufacturers of antihypertensive medication, even if that medication is not mentioned in the manuscript.

In item #1 below, report all support for the work reported in this manuscript without time limit. For all other items, the time frame for disclosure is the past 36 months.

|                                                           |                                                                                                                                                                                | Name all entities with whom you have this relationship or indicate none (add rows as needed)                                                                                                                                                                                                                                                                                                                                                                                                                                                                                                                                                                                                                                                                                                                                    | Specifications/Comments (e.g., if payments were made to you or to your institution) |
|-----------------------------------------------------------|--------------------------------------------------------------------------------------------------------------------------------------------------------------------------------|---------------------------------------------------------------------------------------------------------------------------------------------------------------------------------------------------------------------------------------------------------------------------------------------------------------------------------------------------------------------------------------------------------------------------------------------------------------------------------------------------------------------------------------------------------------------------------------------------------------------------------------------------------------------------------------------------------------------------------------------------------------------------------------------------------------------------------|-------------------------------------------------------------------------------------|
| <b>Time frame: Since the initial planning of the work</b> |                                                                                                                                                                                |                                                                                                                                                                                                                                                                                                                                                                                                                                                                                                                                                                                                                                                                                                                                                                                                                                 |                                                                                     |
| 1                                                         | All support for the present manuscript (e.g., funding, provision of study materials, medical writing, article processing charges, etc.)<br><b>No time limit for this item.</b> | the National Natural Science Foundation of China (81671153)<br>the Guangdong Provincial Key Laboratory of Diagnosis and Treatment of Major Neurological Diseases (2020B1212060017)<br>Guangdong Provincial Clinical Research Center for Neurological Diseases (2020B1111170002)<br>the Southern China International Cooperation Base for Early Intervention and Functional Rehabilitation of Neurological Diseases (2015B050501003, 2020A0505020004)<br>the Guangdong Science and Technology Planning Project (2017B01010015)<br>the Natural Science Foundation of Guangdong Province (2016A030313203)<br>the Guangdong Provincial Engineering Center For Major Neurological Disease Treatment<br>the Guangdong Provincial Translational Medicine Innovation Platform for Diagnosis and Treatment of Major Neurological Disease |                                                                                     |
|                                                           |                                                                                                                                                                                |                                                                                                                                                                                                                                                                                                                                                                                                                                                                                                                                                                                                                                                                                                                                                                                                                                 |                                                                                     |

| Time frame: past 36 months |                                                                                                              |      |  |
|----------------------------|--------------------------------------------------------------------------------------------------------------|------|--|
| 2                          | Grants or contracts from any entity (if not indicated in item #1 above).                                     | None |  |
| 3                          | Royalties or licenses                                                                                        | None |  |
| 4                          | Consulting fees                                                                                              | None |  |
| 5                          | Payment or honoraria for lectures, presentations, speakers bureaus, manuscript writing or educational events | None |  |
| 6                          | Payment for expert testimony                                                                                 | None |  |
| 7                          | Support for attending meetings and/or travel                                                                 | None |  |
| 8                          | Patents planned, issued or pending                                                                           | None |  |
| 9                          | Participation on a Data Safety Monitoring Board or Advisory Board                                            | None |  |
| 10                         | Leadership or fiduciary role in other board, society, committee or advocacy group, paid or unpaid            | None |  |
| 11                         | Stock or stock options                                                                                       | None |  |
| 12                         | Receipt of equipment, materials, drugs, medical writing, gifts or other services                             | None |  |
| 13                         | Other financial or non-financial interests                                                                   | None |  |

**Please summarize the above conflict of interest in the following box:**

Ling Li reports supports for the present manuscript from the National Natural Science Foundation of China (81671153), the Guangdong Provincial Key Laboratory of Diagnosis and Treatment of Major Neurological Diseases (2020B1212060017), Guangdong Provincial Clinical Research Center for Neurological Diseases (2020B1111170002), the Southern China International Cooperation Base for Early Intervention and Functional Rehabilitation of Neurological Diseases (2015B050501003, 2020A0505020004), the Guangdong Science and Technology Planning Project (2017B01010015), the Natural Science Foundation of Guangdong Province (2016A030313203), the Guangdong Provincial Engineering Center For Major Neurological Disease Treatment, the Guangdong Provincial Translational Medicine Innovation Platform for Diagnosis and Treatment of Major Neurological Disease.

Please place an "X" next to the following statement to indicate your agreement:

X I certify that I have answered every question and have not altered the wording of any of the questions on this form.
